# Supplementary material for: PAI1 is a Marker of Bad Prognosis in Rectal Cancer but Predicts a Better Response to Treatment with PIM Inhibitor AZD1208
Source: MDPI journal article supplement (doi:10.3390/cells9051071), 2020-04-25
Supplement: s1 [file s1]

**Muñoz-Galván *et al.* “PAI1 is a marker of bad prognosis in rectal cancer but predicts a better response to treatment with PIM inhibitor AZD1208”**

**Supplementary Material:**

Supplementary Table S1

Supplementary Table S2

Supplementary Table S3

Supplementary Table S4

Supplementary Figure S1

**Supplementary Table S1:** Patient HUVR cohort characteristics.

| <b>Cohort description</b>                                                                                                                                                                                                                                                                                                          | <b>Cohort</b>                                                      |
|------------------------------------------------------------------------------------------------------------------------------------------------------------------------------------------------------------------------------------------------------------------------------------------------------------------------------------|--------------------------------------------------------------------|
|                                                                                                                                                                                                                                                                                                                                    | <b>N=135</b>                                                       |
| <b>Gender (years)</b> <ul style="list-style-type: none"> <li>• Women</li> <li>• Men</li> <li>• Age</li> </ul>                                                                                                                                                                                                                      | 43<br>92<br>Median 68 years old                                    |
| <b>Tumor localization (distance from the anal verge)</b> <ul style="list-style-type: none"> <li>• Low rectum (3-5 cm)</li> <li>• Medium rectum (6-9 cm)</li> <li>• High rectum (10-15 cm)</li> <li>• Non recorded in medical history</li> </ul>                                                                                    | 54<br>45<br>34<br>2                                                |
| <b>Histology and tumoral grade</b> <ul style="list-style-type: none"> <li>• Adenocarcinoma GI</li> <li>• Adenocarcinoma GII</li> <li>• Adenocarcinoma GIII</li> <li>• Non recorded in medical history</li> </ul>                                                                                                                   | 28<br>67<br>5<br>35                                                |
| <b>Pre-treatment stage (TNM)</b> <ul style="list-style-type: none"> <li>• I</li> <li>• IIA</li> <li>• IIB</li> <li>• IIC</li> <li>• IIIA</li> <li>• IIIB</li> <li>• IIIC</li> <li>• IV</li> </ul>                                                                                                                                  | 1<br>23<br>3<br>10<br>7<br>67<br>22<br>2                           |
| <b>Surgery</b> <ul style="list-style-type: none"> <li>• Low anterior resection</li> <li>• Abdominoperineal resection</li> <li>• Other procedures</li> </ul>                                                                                                                                                                        | 89<br>41<br>5                                                      |
| <b>Tumor recurrence</b> <ul style="list-style-type: none"> <li>• No events</li> <li>• Local relapse</li> <li>• Hepatic relapse</li> <li>• Lung relapse</li> <li>• Local and Hepatic relapse</li> <li>• Local and Lung relapse</li> <li>• Local and peritoneal relapse</li> <li>• Distant relapse in other localizations</li> </ul> | <b>Tumor recurrence</b><br>101<br>11<br>7<br>7<br>2<br>3<br>1<br>3 |

**Supplementary Table S2.** Mutational analysis of the CRC cell lines used in this study.

| <i>Cell line</i> | Kras mutation    | Braf V600E       | PI3KCA mutation      |
|------------------|------------------|------------------|----------------------|
| <b>COLO205</b>   | <b>Wild type</b> | <b>Mutated</b>   | <b>G914R</b>         |
| <b>HT29</b>      | <b>Wild type</b> | <b>Mutated</b>   | <b>P449T</b>         |
| <b>HCT116</b>    | <b>G13D</b>      | <b>Wild type</b> | <b>H1047R</b>        |
| <b>LS180</b>     | <b>G12D</b>      | <b>Wild type</b> | <b>H1047R</b>        |
| <b>LOVO</b>      | <b>G13D</b>      | <b>Wild type</b> | <b>ND</b>            |
| <b>T84</b>       | <b>G13D</b>      | <b>Wild type</b> | <b>E542K; H1047R</b> |
| <b>SW480</b>     | <b>G12V</b>      | <b>Wild type</b> | <b>ND</b>            |
| <b>SW48</b>      | <b>Wild type</b> | <b>Wild type</b> | <b>G914R</b>         |

**Supplementary Table S3.** Characteristics of patient public databases used in this study.

| Databases       | N                                    | Sex                | Age                                                             | histology                                      | Reference                                     |
|-----------------|--------------------------------------|--------------------|-----------------------------------------------------------------|------------------------------------------------|-----------------------------------------------|
| <b>GSE8671</b>  | NT=32<br>T=32                        | F=37.5%<br>M=62.5% | 38-83<br>20-50=15.6%<br>50-83=84.4%                             | Non tumoral<br>Adenocarcinoma<br>Rectum        | Sabates-Bellver J et al., Mol Cancer Res 2007 |
| <b>GSE35452</b> | T=46                                 | nd                 | 0-90                                                            | Rectal cancer                                  |                                               |
| <b>GSE2109</b>  | T=38                                 | F=18<br>M=20       | 20-90                                                           | Adenocarcinoma<br>Rectum                       |                                               |
| <b>GSE21510</b> | NT=25<br>T=homogenized 19<br>Lcm=104 | F=1/3<br>M=2/3     | 20-92                                                           | CRC                                            | Tsukamoto et al., Clin Cancer Res 2011        |
| <b>GSE4183</b>  | NT=8<br>T=15                         | F=94<br>M=51       | NT=50.6 +- 5.97<br>T= DukeB =65.3 +-13.6<br>Duke C-D=67.5+-11.8 | Healthy =8<br>CRC Duke B= 7<br>CRC Duke C-D= 8 | Galamba O et al., Dis Markers 2008            |
| <b>GSE20916</b> | NT=34<br>T=111                       | F=94<br>M=51       | 38-85                                                           | Adenocarcinoma de colon                        | Skrzypczak M et al., PLoS One. 2010           |
| <b>GSE33114</b> | NT=6<br>T=90                         | F=48<br>M=42       | 34-95                                                           | Primary colorectal cancer                      | de Sousa E Melo et al., Cell Stem Cell. 2011  |

**Supplementary Table S4.** Determination of the IC<sub>50</sub> value (concentration of drug necessary to induce 50% of cell death) to AZD1208, Dasatinib and Vemurafenib. Average and SEM of three independent experiments is shown.

| Cell lines | IC50 (μM)  |              |              |
|------------|------------|--------------|--------------|
|            | AZD1208    | Dasatinib    | Vemurafenib  |
| LS180      | 7.2 ± 0.7  | 5.3 ± 0.8    | 6.2 ± 0.8    |
| Sw48       | 2.9 ± 1    | 12 ± 1.4     | 4.5 ± 1      |
| Sw480      | 2.8 ± 1.2  | 3.1 ± 1.2    | 6.4 ± 0.7    |
| T84        | 6.24 ± 0.7 | 2.2 ± 0.9    | 4.3 ± 1.3    |
| Lovo       | 6.8 ± 1.2  | 1.1 ± 0.5    | 6.2 ± 0.5    |
| Ht29       | 15 ± 0.9   | 4 ± 1        | 5.2 ± 0.9    |
| Hct116     | 31.7 ± 2.3 | 0.11 ± 0.012 | 5.14 ± 0.8   |
| Colo205    | 18 ± 1.4   | 1.7 ± 0.2    | 0.03 ± 0.006 |

## Supplementary Figure S1

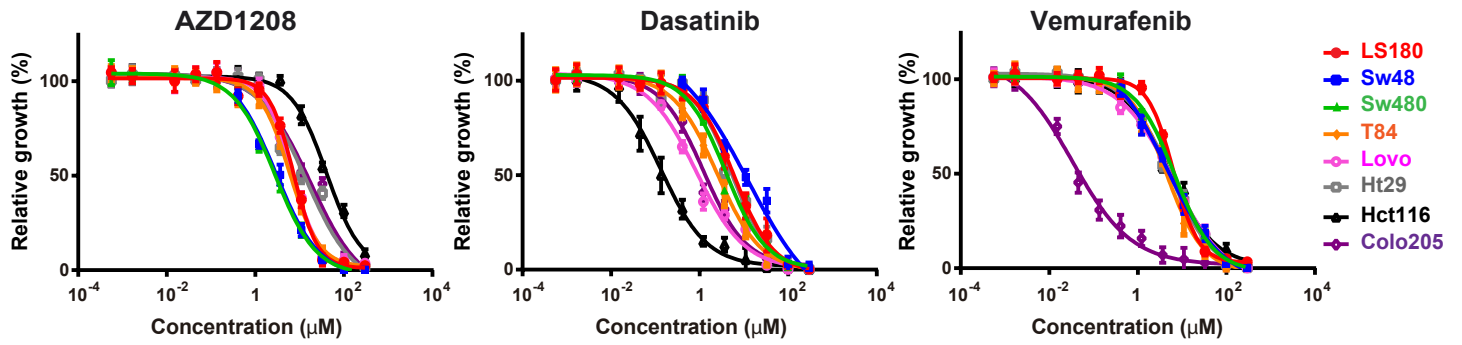

**Figure S1. Determination of IC<sub>50</sub> value.** Representative graph of IC<sub>50</sub> curves (IC<sub>50</sub> concentration that induces a 50% of cell death) to PIM Inhibitor AZD1208, Dasatinib or Vemurafenib for the cell lines LS180, Sw48, Sw480, T84, Lovo, Ht29, Hct116 and Colo205.
